# Supplementary material for: Black carbon modelling in urban areas: investigating the influenceof resuspension and non-exhaust emissions in streets using theStreet-in-Grid (SinG) model
Source: Copernicus journal article supplement (doi:10.5194/gmd-2020-386), 2020-12-29
Supplement: Supplementary file [file gmd-2020-386-AC1-supplement.pdf]

Black carbon modelling in urban areas: investigating the  
influence of resuspension and non-exhaust emissions in streets  
using the Street-in-Grid (SinG) model :  
**Answers to referees' comments**

August 27, 2021

## 1 Executive editor - Astrid Kerkweg

Received and published: 26 February 2021

Dear authors,

in my role as Executive editor of GMD, I would like to bring to your attention our Editorial version 1.2: <https://www.geosci-model-dev.net/12/2215/2019/> This highlights some requirements of papers published in GMD, which is also available on the GMD website in the 'Manuscript Types' section: [http://www.geoscientific-model-development.net/submission/manuscript\\_types.html](http://www.geoscientific-model-development.net/submission/manuscript_types.html)

In particular, please note that for your paper, the following requirement has not been met in the Discussions paper:

- "The main paper must give the model name and version number (or other unique identifier) in the title."

Please add a version number for SinG in the title upon your revised submission to GMD.

Yours,  
Astrid Kerkweg

**Author response:** The SinG version is now included in the title: *"Black carbon modelling in urban areas: investigating the influence of resuspension and non-exhaust emissions in streets using the Street-in-Grid model for inert particles (SinG-inert)"*.
